# Supplementary material for: Community structure informs species geographic distributions
Source: PLoS One. 2018 May 23;13(5):e0197877. doi: 10.1371/journal.pone.0197877 (PMC5965839; doi:10.1371/journal.pone.0197877)
Supplement: S3 Table — Summary for all the significant links inferred between species. Species involved (from: parent node, to: children node), strength and direction of the association based on the number of times that the link appears in the resampled networks, sign and significance of the sign based on the Jonckheere trend test and the syndrome code for the interspecific association. (XLSX) [file pone.0197877.s005.xlsx]

## Sheet: TS3_Links
from	to	strength	direction	statistic	p.value	sindrome			Contingency tables
Arune	Cipop	0.892	0.914798	8.40709	4.20309e-17	TQ					Observed	Expected		Observed	Expected
Arune	Erarb	1	0.97	10.6477	1.78705e-26	TQ				TT	32	15.75
Arune	Phang	0.998	0.973948	7.94647	1.91898e-15	TT				QQ	20	15.75	TT or QQ	52	31.5
Arune	Vitin	0.996	0.929719	8.46024	2.66829e-17	TT				TQ	7	15.75	TQ or QT	11	31.5
Brret	Loimp	0.996	0.995984	6.0262	1.67855e-09	NA				QT	4	15.75
Brret	Ulpar	0.644	0.714286	4.27678	1.89618e-05	NA				Total	63
Caisp	Pipin	0.622	0.92926	2.61514	0.00891898	QT
Calvu	Ersco	0.978	0.977505	6.14046	8.22825e-10	QQ
Calvu	Getri	0.58	0.831034	6.38451	1.71947e-10	QQ
Cialb	Rooff	0.838	0.809069	6.43705	1.21814e-10	QQ
Cilad	Cysco	0.54	0.988889	3.15949	0.00158044	QQ
Cilad	Eraus	0.972	0.989712	8.18478	2.72793e-16	QQ
Cimon	Phpur	0.85	0.72	3.88433	0.000102612	QQ
Cymul	Cystr	0.902	0.824834	5.93482	2.94172e-09	QQ
Cymul	Daglo	0.624	0.926282	3.36867	0.000755305	NA
Cymul	Laped	0.95	0.526316	7.13451	9.7133e-13	QQ
Cysco	Piter	0.644	0.521739	5.84244	5.14409e-09	QT
Dagni	Osalb	0.808	0.680693	5.54113	3.00522e-08	TT
Dagni	Qurot	0.636	0.915094	4.87221	1.10355e-06	TT
Eraus	Pttri	0.694	0.587896	6.61944	3.6055e-11	QQ
Ersco	Phang	0.59	0.589831	5.99646	2.0167e-09	QT
Erumb	Getri	0.554	0.711191	5.19766	2.01813e-07	QQ
Erumb	Pttri	0.8	0.8975	6.49095	8.52961e-11	QQ
Hehel	Ilaqu	0.654	0.764526	3.58805	0.000333157	TT
Hehel	Qucan	0.532	0.909774	2.12905	0.0332498	TT
Hehel	Quile	0.738	0.547425	2.18757	0.0287009	TT
Ilaqu	Cocan	0.546	0.553114	3.32084	0.000897463	NA
Laped	Cilad	0.764	0.696335	2.35351	0.0185972	QQ
Lasto	Calvu	0.716	0.581006	7.80479	5.95995e-15	QQ
Lasto	Cicri	0.888	0.855856	7.97152	1.56739e-15	QQ
Lasto	Cilad	0.684	0.549708	8.68918	3.6505e-18	QQ
Lasto	Cimon	0.924	0.558442	7.35085	1.96957e-13	QQ
Lasto	Cisal	0.758	0.905013	6.71325	1.90341e-11	QQ
Loimp	Qucoc	0.642	0.962617	6.81722	9.28178e-12	TT
Loimp	Ruper	0.61	0.878689	4.95518	7.22619e-07	TT
Oleur	Pilen	1	0.894	8.84321	9.30088e-19	TT
Oleur	Rhala	0.604	0.576159	4.6909	2.72006e-06	TT
Phang	Dagni	0.56	0.835714	4.83262	1.34751e-06	TT
Pipin	Cisal	0.586	0.744027	2.62374	0.00869711	TQ
Pilen	Mycom	0.892	0.863229	8.18428	2.73926e-16	TT
Pilen	Qucoc	1	0.998	9.75372	1.77829e-22	TT
Piter	Asacu	0.544	0.716912	2.22511	0.0260735	TT
Qurob	Ilaqu	0.84	0.892857	5.81221	6.16524e-09	TT
Qurob	Loper	0.704	0.582386	3.37936	0.000726539	TT
Qurob	Uleur	0.698	0.581662	6.37394	1.84237e-10	TQ
Qurob	Ulmin	0.898	0.948775	10.1053	5.23137e-24	TQ
Qurot	Piter	0.85	0.948235	5.37824	7.52177e-08	TT
Rhala	Pilen	0.722	0.526316	6.10794	1.00928e-09	TT
Ruper	Asacu	0.58	0.993103	4.25857	2.0574e-05	TT
Ruper	Dagni	0.624	0.807692	4.58616	4.51475e-06	TT
Ruper	Smasp	0.994	0.891348	7.87255	3.47484e-15	TT
Ruulm	Saatr	1	0.98	5.11551	3.12899e-07	NA
Ruacu	Crmon	0.902	0.993348	7.27739	3.40345e-13	TT
Ruacu	Hehel	0.568	0.602113	5.90879	3.44625e-09	TT
Ruacu	Loper	0.618	0.97411	7.0975	1.2703e-12	TT
Ruacu	Ruper	0.912	0.622807	8.53135	1.44649e-17	TT
Ruacu	Tacom	0.928	0.924569	8.0186	1.06961e-15	NA
Smasp	Oleur	0.576	0.975694	6.50859	7.5857e-11	TT
Smasp	Rhala	0.934	0.925054	5.71882	1.07267e-08	TT
Smasp	Ruulm	0.802	0.987531	5.1146	3.14399e-07	TT
Tacom	Brsyl	0.606	0.960396	5.76923	7.9635e-09	NA
Tacom	Loper	0.768	0.765625	6.74823	1.49663e-11	NA
Tacom	Qufag	0.966	0.774327	7.07911	1.45079e-12	NA
Tacom	Tesco	0.802	0.937656	6.38024	1.76809e-10	NA
Uleur	Cocan	1	0.87	5.14342	2.69788e-07	NA
Ulpar	Caisp	0.884	0.678733	4.84669	1.25539e-06	QQ
Ulpar	Cialb	0.892	0.979821	5.11657	3.11137e-07	QQ
Ulpar	Cimon	0.63	0.977778	5.42149	5.91051e-08	QQ
Ulpar	Pipis	0.77	0.924675	4.08827	4.346e-05	QT
Vitin	Loimp	0.95	0.945263	6.37875	1.78542e-10	TT
Vitin	Phlat	0.75	0.986667	6.31924	2.62854e-10	TT
Brret	Quhum	0.592	0.631757	-3.69368	0.000221029	NA
Crmon	Rooff	0.574	0.878049	-3.88721	0.000101403	TQ
Quhum	Dagni	0.57	0.978947	-2.68733	0.00720268	TT
Ruper	Eraus	0.522	0.927203	-3.81066	0.000138594	TQ
